# Supplementary material for: A Physically Constrained Deep-Learning Fusion Method for Estimating Surface NO2 Concentration from Satellite and Ground Monitors
Source: PubMed Central journal article supplement (PMC11618989; doi:10.1021/acs.est.4c07341), 2024-11-20
Supplement: es4c07341_si_001.pdf [file es4c07341_si_001.pdf]

1 **Supplementary information for A physically constrained deep-**  
2 **learning fusion method for estimating surface NO<sub>2</sub> concentration**  
3 **from satellite and ground monitors**

4 Jia Xing<sup>1,2</sup>, Bok H. Baek<sup>1,\*</sup>, Siwei Li<sup>3,\*</sup>, Chi-Tsan Wang<sup>1</sup>, Ge Song<sup>3</sup>, Siqu Ma<sup>1</sup>, Shuxin Zheng<sup>4</sup>, Chang Liu<sup>4</sup>,  
5 Daniel Tong<sup>1</sup>, Jung-Hun Woo<sup>5</sup>, Tie-Yan Liu<sup>4</sup>, Joshua S. Fu<sup>2</sup>

6 <sup>1</sup> Center for Spatial Information Science and Systems, George Mason University, Fairfax, VA 22030,  
7 USA

8 <sup>2</sup> Department of Civil and Environmental Engineering, the University of Tennessee, Knoxville, TN  
9 37996, USA

10 <sup>3</sup> Hubei Key Laboratory of Quantitative Remote Sensing of Land and Atmosphere, School of Remote  
11 Sensing and Information Engineering, Wuhan University, Hubei, 430000, China

12 <sup>4</sup> Microsoft Research AI for science, Beijing 100080, China

13 <sup>5</sup> Department of Environmental Planning, Seoul National University, Seoul, Korea

14

15 *Correspondence to:* Bok H. Baek (bbaek@gmu.edu); Siwei Li (email: siwei.li@whu.edu.cn)

16

17 **Summary:**

18 Pages: 23

19 Figures: S1-S14

20 Texts: S1-S2

## 1 **Text S1 Two-stage strategy for optimization of hyperparameter through Testbed**

2 As illustrated in our previous study<sup>8</sup>, the weight of each loss component in the total loss function  
3 is a key parameter ( $\alpha$ ) in the DeepMMF that needs to be determined through optimization. This  
4 involves conducting multiple DeepMMF training sessions and testing the results to calculate both  
5 the loss of emissions and concentrations, ultimately identifying the optimal hyperparameter values.  
6 We introduce the simulation data as a testbed to design the optimization strategy for the selection  
7 of hyperparameters including the weight of each loss component and sensitivity to the prior  
8 emissions.

9 Dynamic selection of appropriate prior emissions and balancing the discrepancy between the  
10 divergence from prior emissions to posterior emissions and the divergence from observed  
11 concentration to fused concentration are crucial for solving the inversion problem in DeepMMF.

12 As suggested in our previous study<sup>5</sup>, using numerical model simulations as a testbed can be highly  
13 beneficial for providing “ground truth” to validate and improve machine-learning models. This  
14 method should be applied in various scenarios, including those established by numerical models,  
15 even though they might not fully reflect reality.

16 First, in Stage 1 we examine the method of using the same prior emissions for inversion. One  
17 scenario involves using lower prior emissions, where the concentration in a double-emission  
18 scenario (“Hypo-2”) is used to retrieve the emissions, with the baseline emission as priori. The  
19 other scenario involves using higher prior emissions, where the concentration in a baseline  
20 emission scenario (“Baseline”) is used to retrieve the emissions, but with double emissions as  
21 priori. We conducted multiple experiments with different weighting values (ranging from 0.1 to  
22 100) for these two components in the loss function during training. Using the traditional L-curve  
23 method to select the optimal weighting value ( $\alpha$ ) for DeepMMF, results showed significant  
24 underestimation or overestimation ( $\pm 20\%$ ) if using lower or higher prior emissions, respectively.

1 Their differences will also be considerably underestimated (the testbed suggested a change ratio  
2 of only 70%, while the ground truth is 100%).

3 In Stage 2, based on the optimized weighting value ( $\beta$ ) (represented by two red points in Figure  
4 S3a), we conducted multiple experiments with different prior emissions ranging from nearly zero  
5 emissions (0.000001) to 2.4 times baseline emissions. Results indicate that the selection of prior  
6 emissions significantly impacts the performance in predicting concentrations. Interestingly,  
7 selecting double emissions as priori in Case 1 and selecting 0.9 times emissions as priori in Case  
8 2 (green points in Figure S3b) exhibited considerably lower biases in predicting concentrations  
9 compared to the original cases (red points in Figure S3b). Both scenarios also achieved results  
10 closer to the ground truth, with the change ratio significantly reduced (estimated at 111%, closer  
11 to the ground-truth of 100%). Therefore, dynamically selecting prior emissions for estimating  
12 changes is crucial, particularly for this study when substantial changes are expected from 2019 to  
13 2020 due to the COVID-19.

14

1 **Text S2 Two-stage strategy for optimization of hyperparameter in 2019 and 2020**

2 Following Stage 1, which involved optimizing the hyperparameters for weighting the two loss  
3 components, we conducted multiple experiments with different weighting values ranging from 0.1  
4 to 100. The results indicate that all experiments lie on the L-curve, showing a decrease in the  
5 divergence from observed concentration to fused concentration as the divergence from prior  
6 emissions to posterior emissions increases. The optimal configuration, identified at the turn-around  
7 point, occurs with a weight of 0.7 ( $\beta$ ) of the base prior emission, as indicated by the red points in  
8 Figure S10a. This suggests that further adjustments to the prior emissions provide only marginal  
9 benefits in reducing biases in concentration.

10 We applied the same weighting value (0.7) but with different prior emissions during VAE training  
11 in Stage 2, using various ratios of the 2019 NEI prior emissions, ranging from 0.7 to 1.4 times.  
12 The divergence from observed concentration to fused concentration in each case is compared in  
13 Figure S10b. For 2019, using the baseline emission as the prior emission results in the smallest  
14 discrepancy from the observation, which is also the optimized prior emission. In contrast, for 2020,  
15 using 0.8 times the baseline emission results in the smallest discrepancy from the observation,  
16 which is lower than the baseline emission, suggesting that a smaller prior emission should be used  
17 for 2020.

18

1

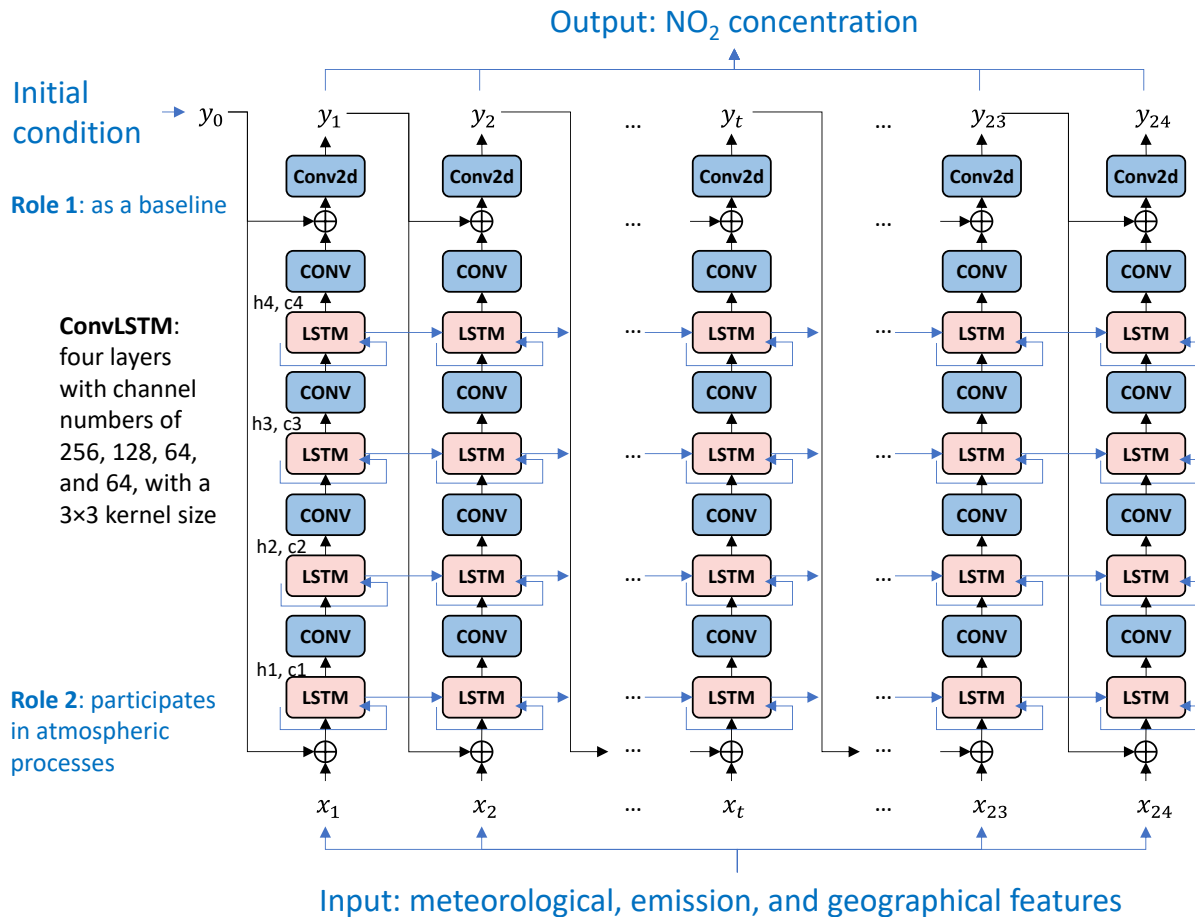

2

3 **Figure S1.** Model structure of DeepCTM, same as [Li and Xing \(2024\)](#), we use convLSTM  
 4 model to predict the hourly concentrations with the time-series of meteorological factors  
 5 observed over a 24-hour period, as well as time-independent geographical features, and daily  
 6 emission data; In adherence to physical laws, we feed the initial condition into the model twice  
 7 to account for its role in atmospheric physical and chemical processes and its function as a  
 8 modulatable baseline to facilitate the training process. Furthermore, we've designed a dual-  
 9 model that incorporates both forward and backward models concurrently, considering satellite  
 10 measurements at 24-hour intervals, to constrain the concentration and mitigate the issue of error  
 11 accumulation)

12

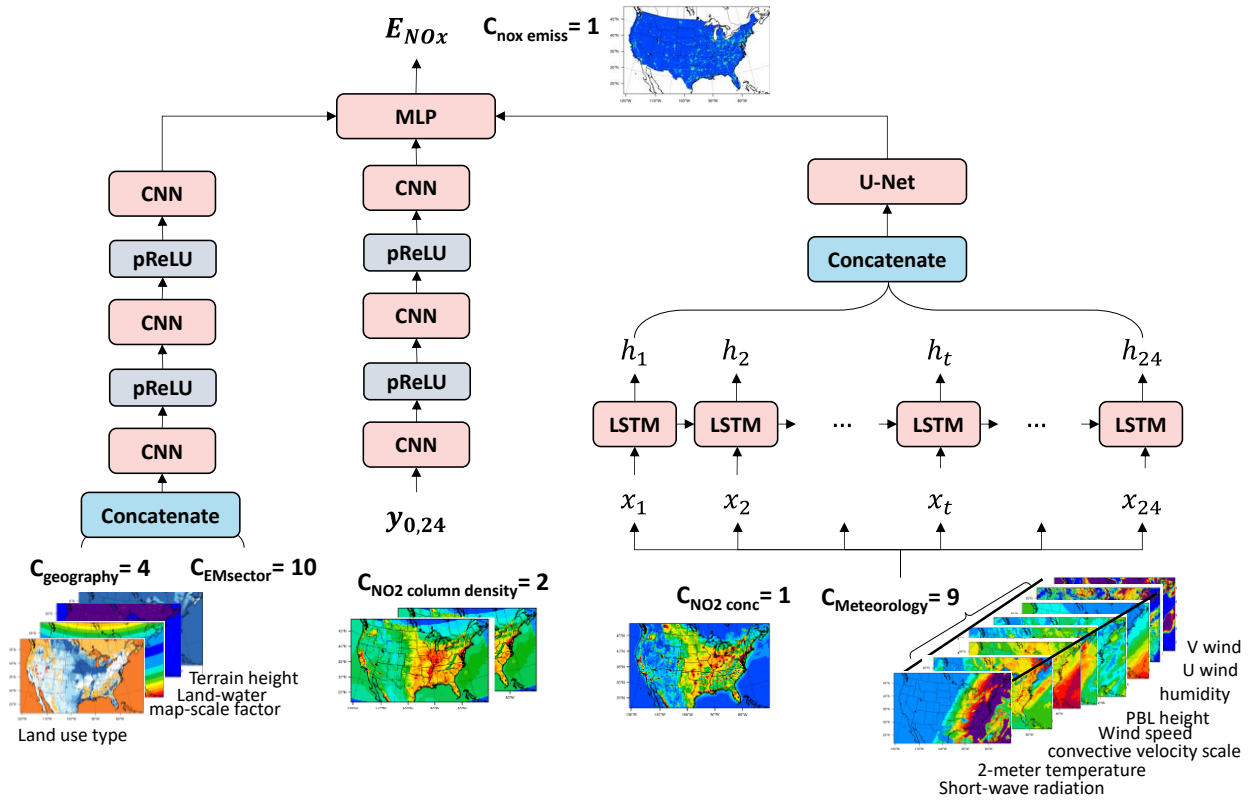

1

2

**Figure S2.** Model structure of encoder in VAE, same as Li and Xing (2024), we use UNet-LSTM to estimates emission adjustments to align with the observed concentration. We input all time-series features, including and ground-NO<sub>2</sub> concentration and meteorological factors, into the LSTM layer to extract temporal features. These temporal features are then combined with time-independent features, such as terrain height and sectoral emission profiles (ratio to total emission), and the two-hour concentrations observed by satellites (at hour 0 and hour 24). This information is used to predict the 24-hour average emissions between these two time points

8

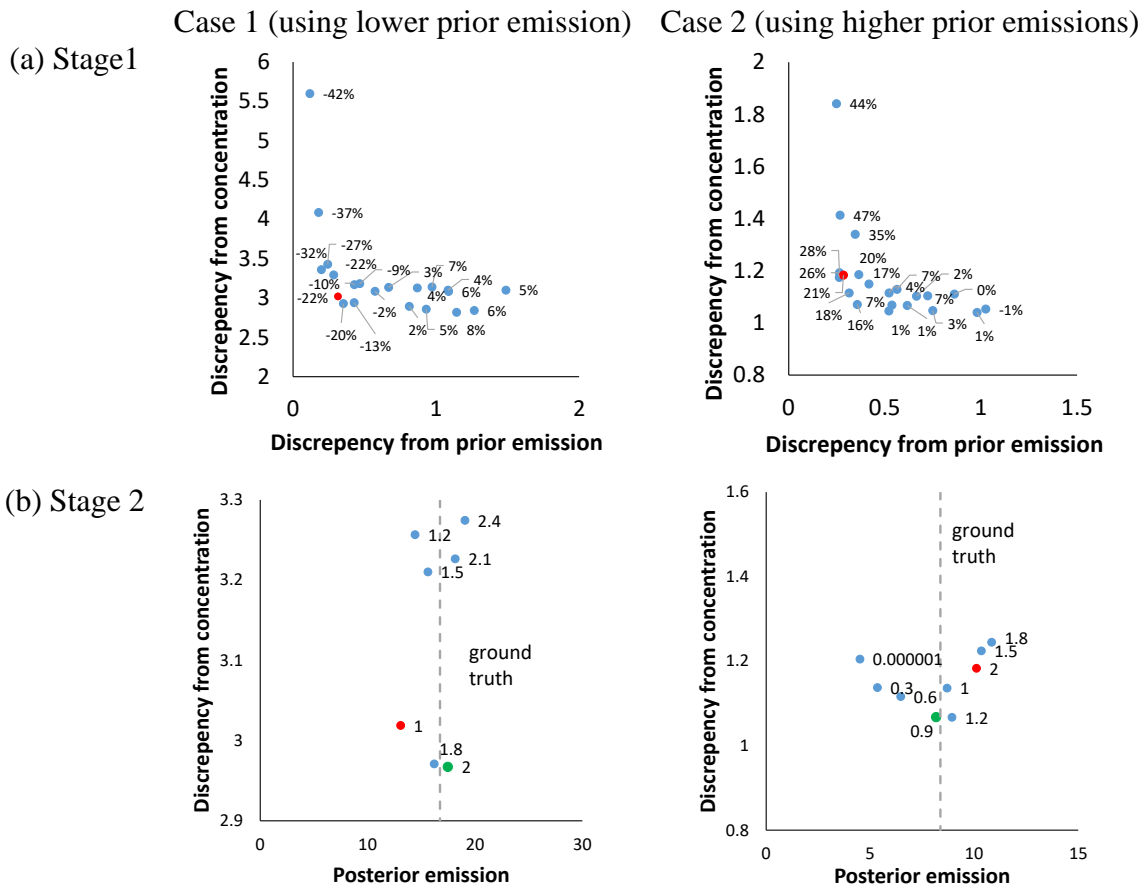

**Figure S3.** Testbed to validate the model performance in predicting the emissions by using different prior emissions (Stage 1 (a): the points are labeled by the normalized bias from the ground-truth; Stage 2 (b): the points are labeled by the prior emission ratio to the baseline emission)

1  
2  
3  
4  
5  
6

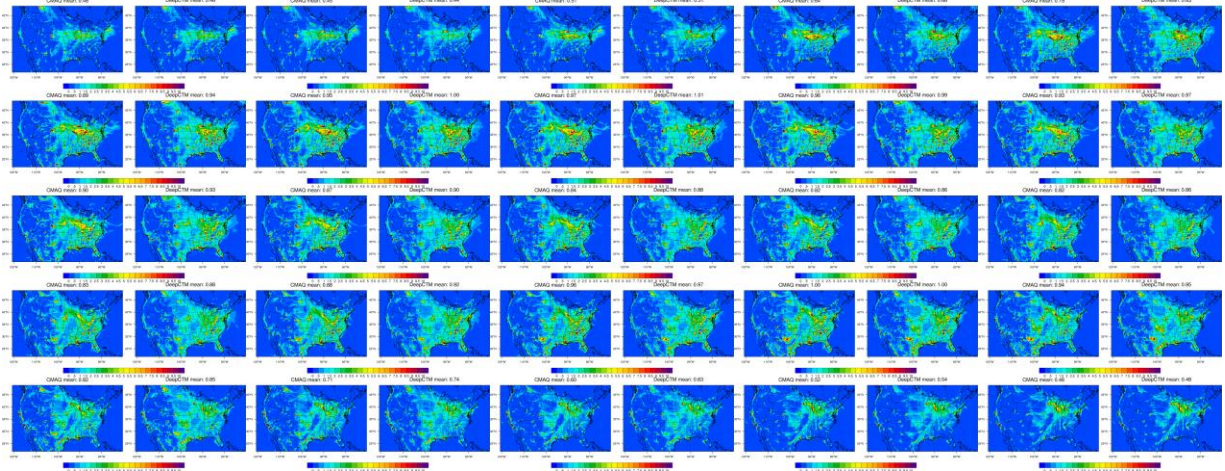

(a) spatial distribution

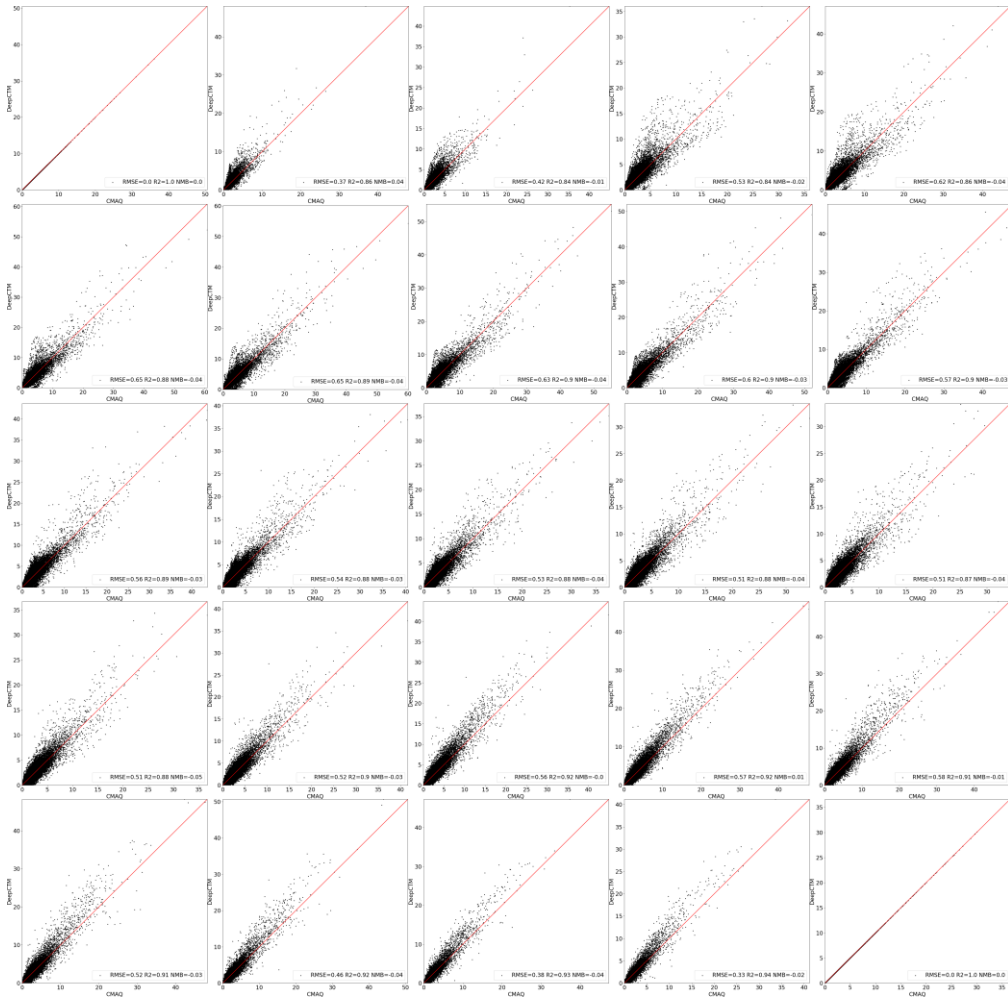

(b) point-to-point comparison

**Figure S4.** The performance of DeepCTM1 in estimating surface NO<sub>2</sub> concentration with emission and meteorology in a training example (January 6, 0 – 24 hour)



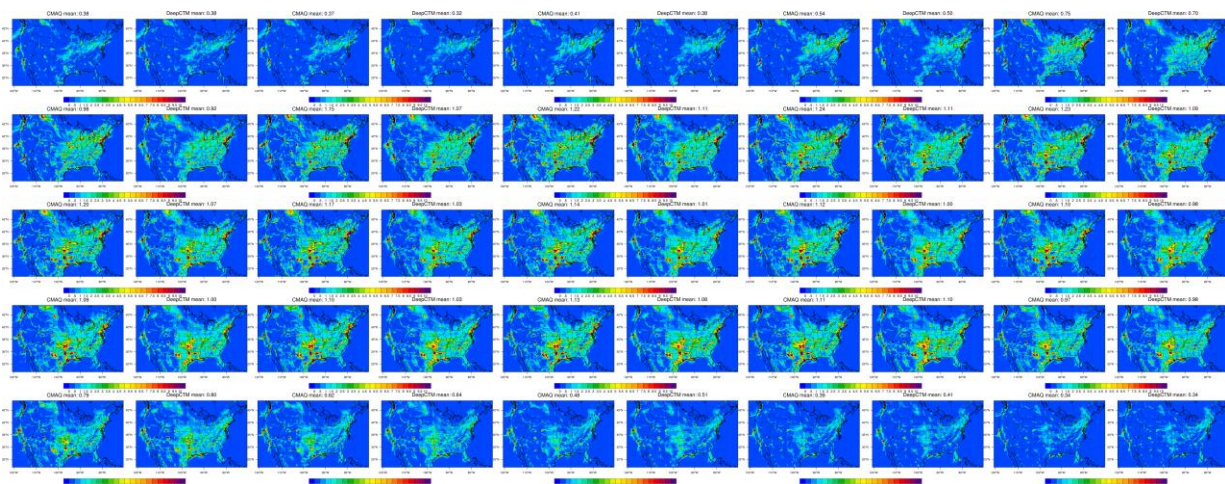

(a) spatial distribution

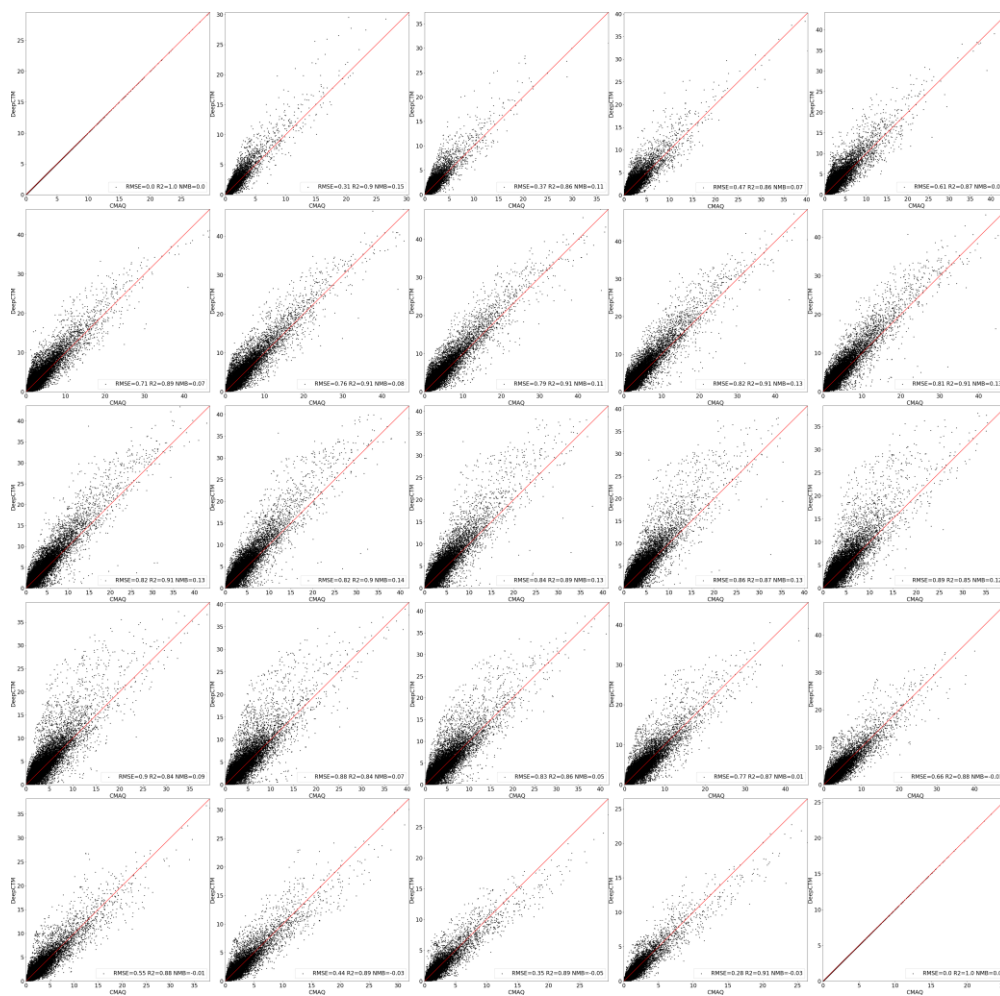

(b) point-to-point comparison

**Figure S5.** Same as Figure S1 but in a test example (January 26, 0 – 24 hour)

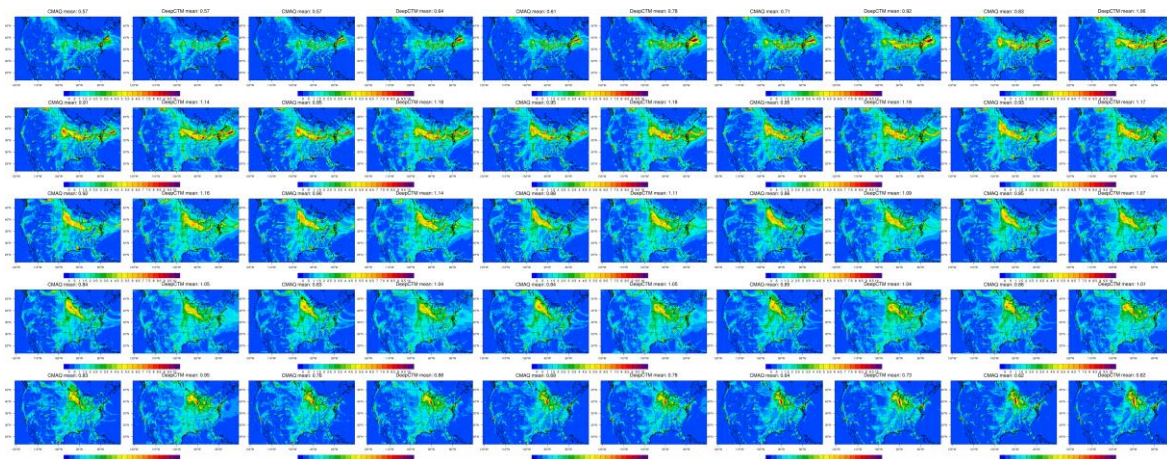

(a) spatial distribution

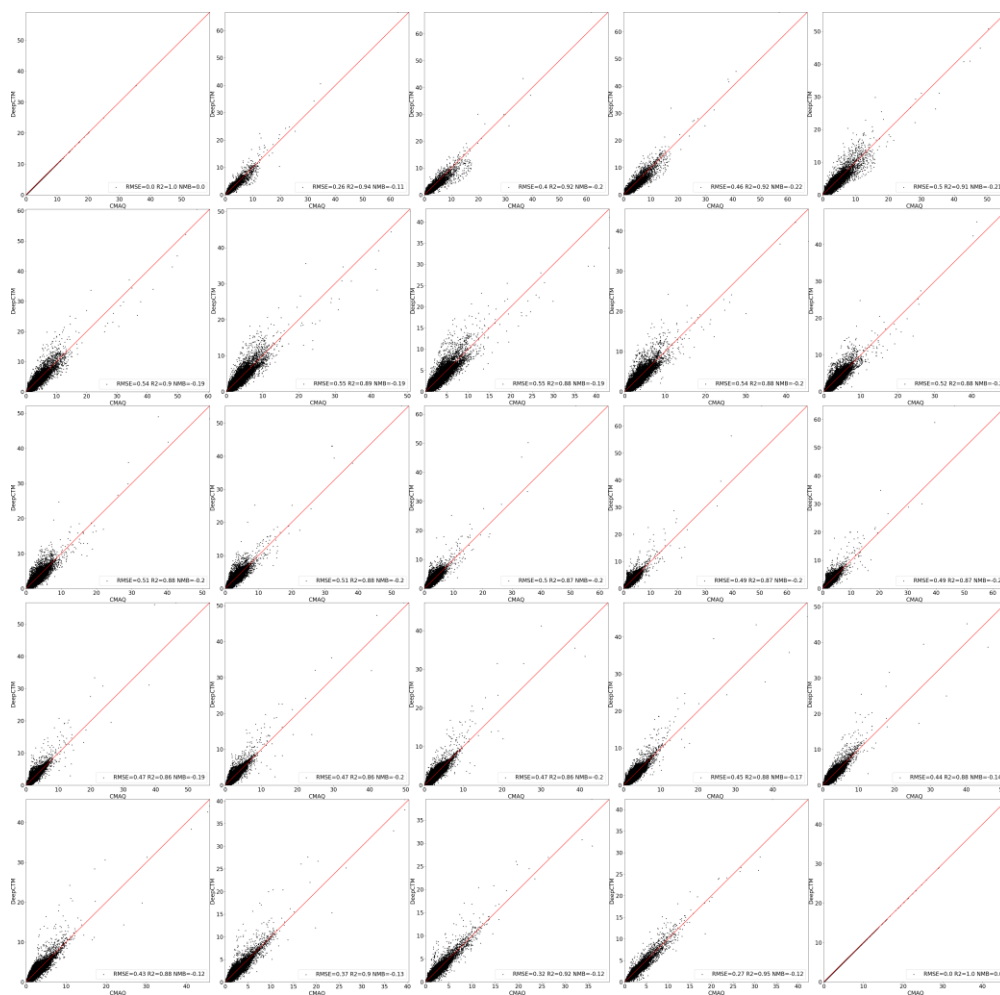

(b) point-to-point comparison

**Figure S6.** The performance of DeepCTM2 in estimating NO<sub>2</sub> column density with emission and meteorology in a training example (January 6, 0 – 24 hour)

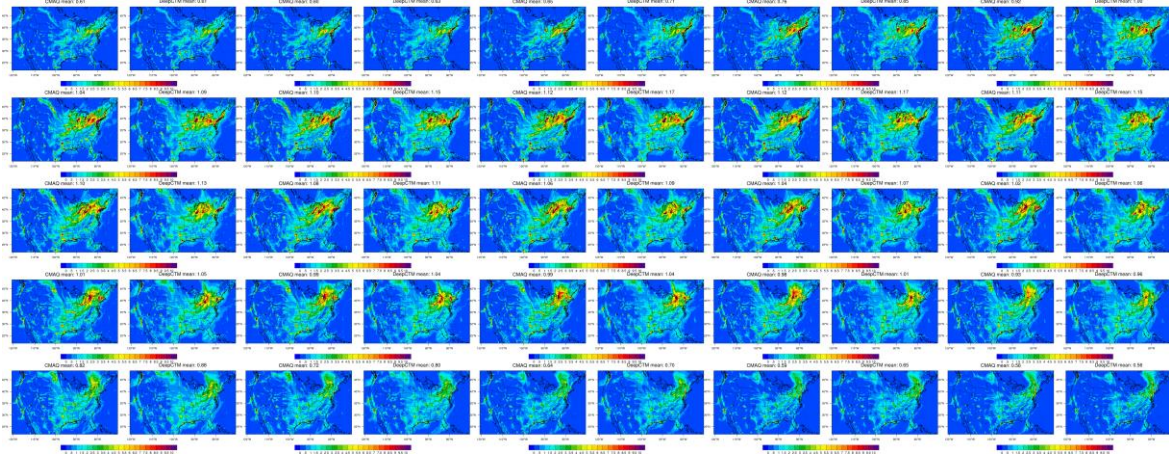

(a) spatial distribution

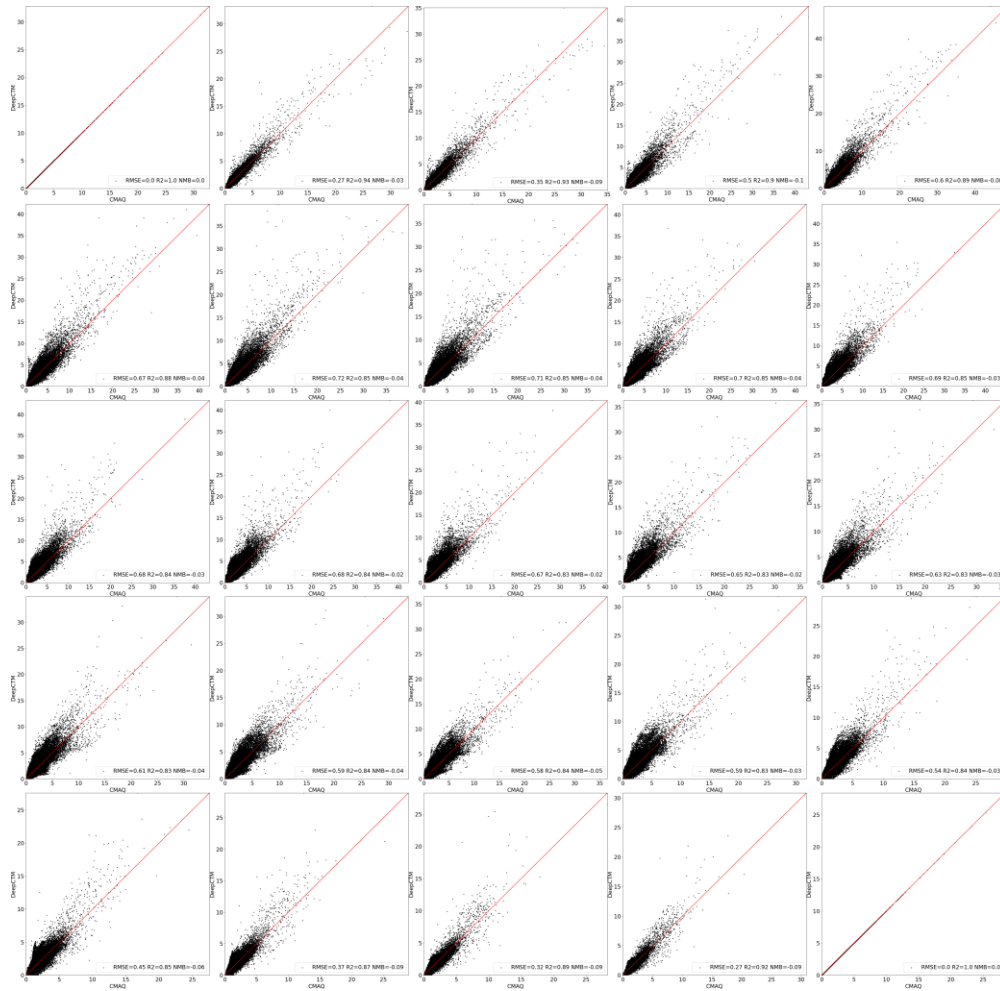

(b) point-to-point comparison

**Figure S7.** Same as Figure S3 but in a test example (January 26, 0 – 24 hour)

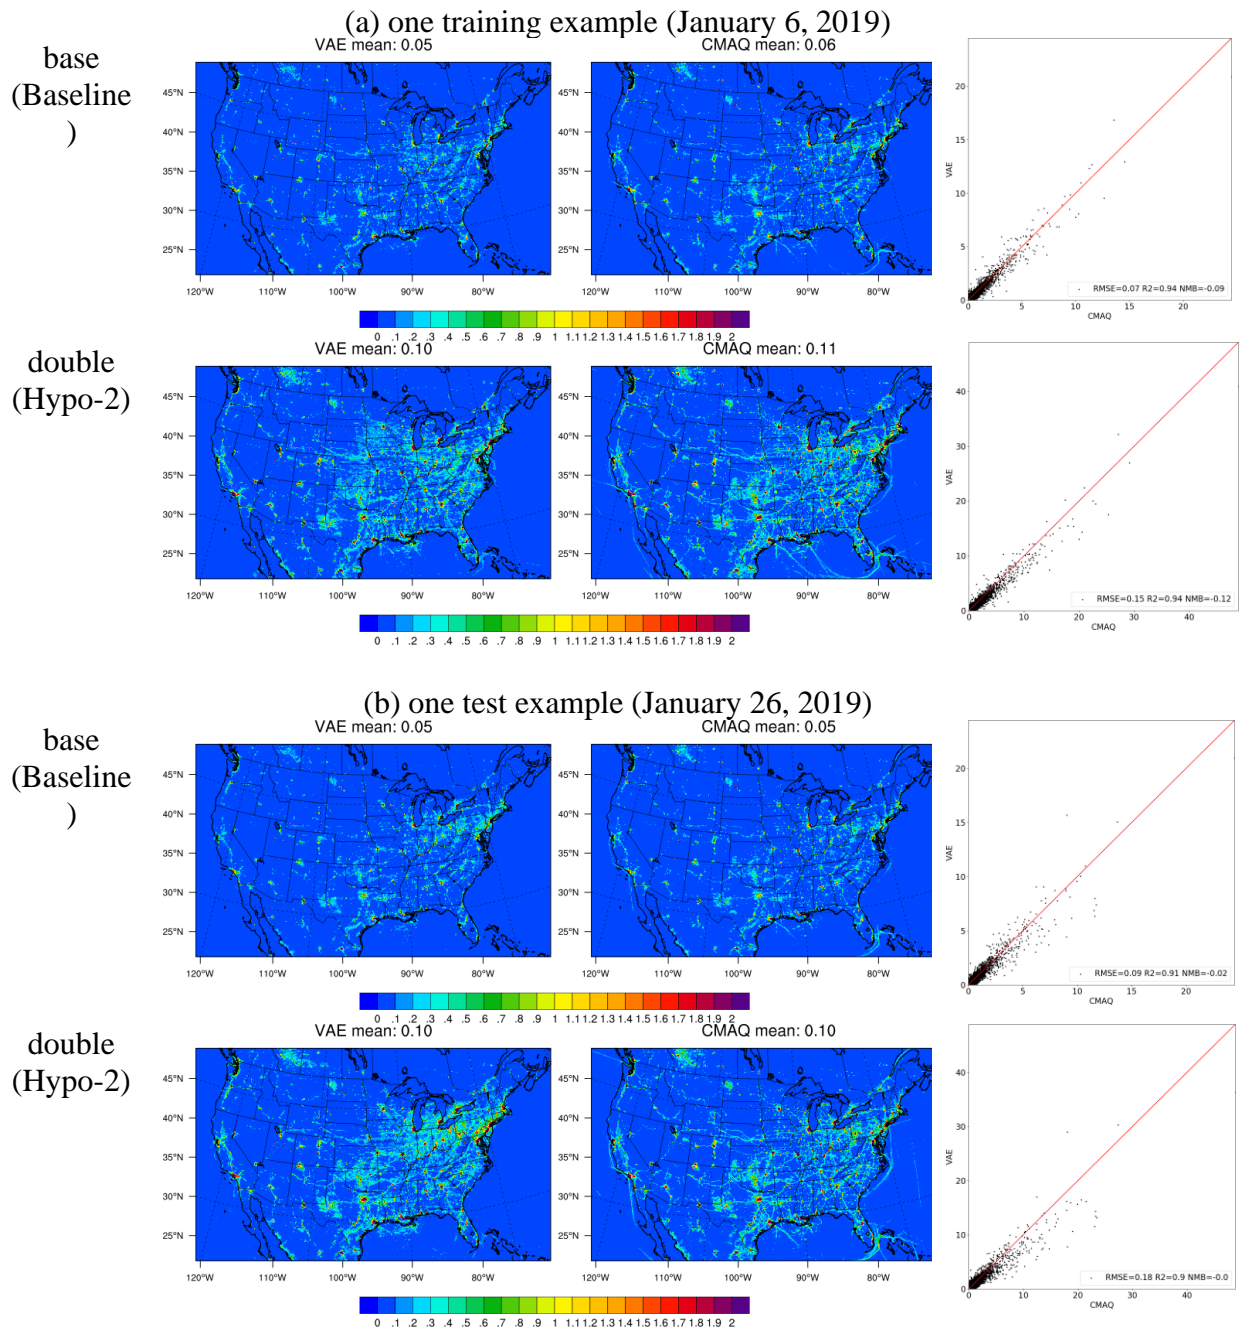

**Figure S8.** The performance of pre-trained VAE in estimating emissions with concentrations and meteorology in two scenarios

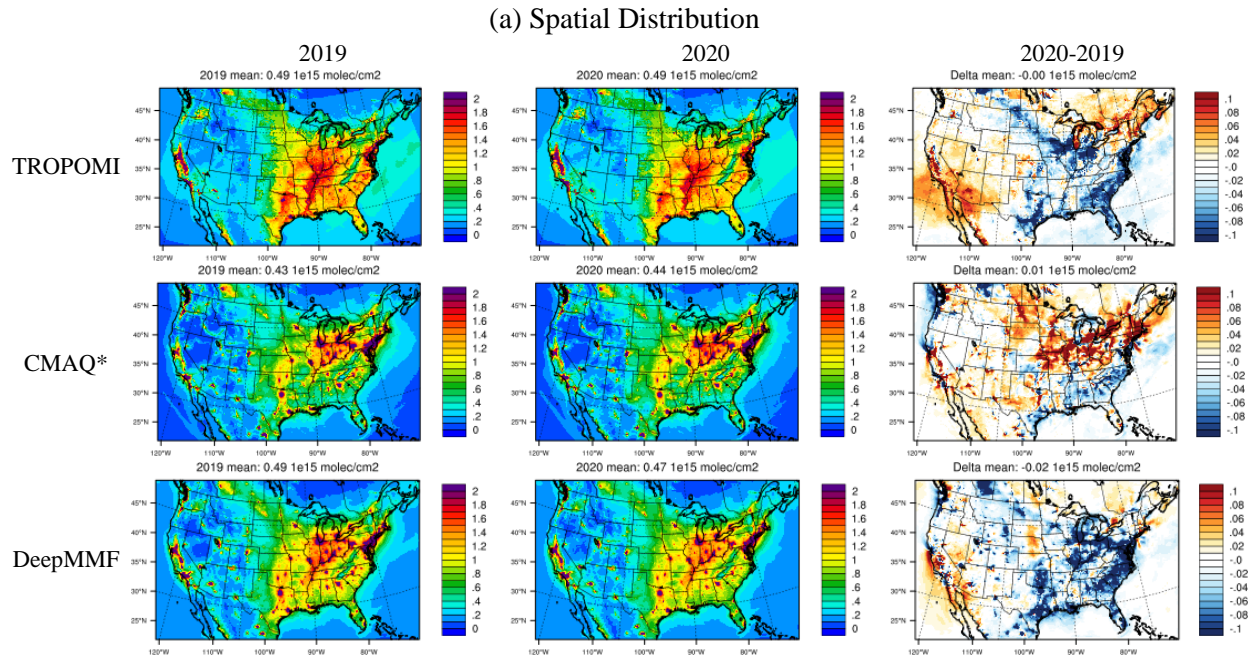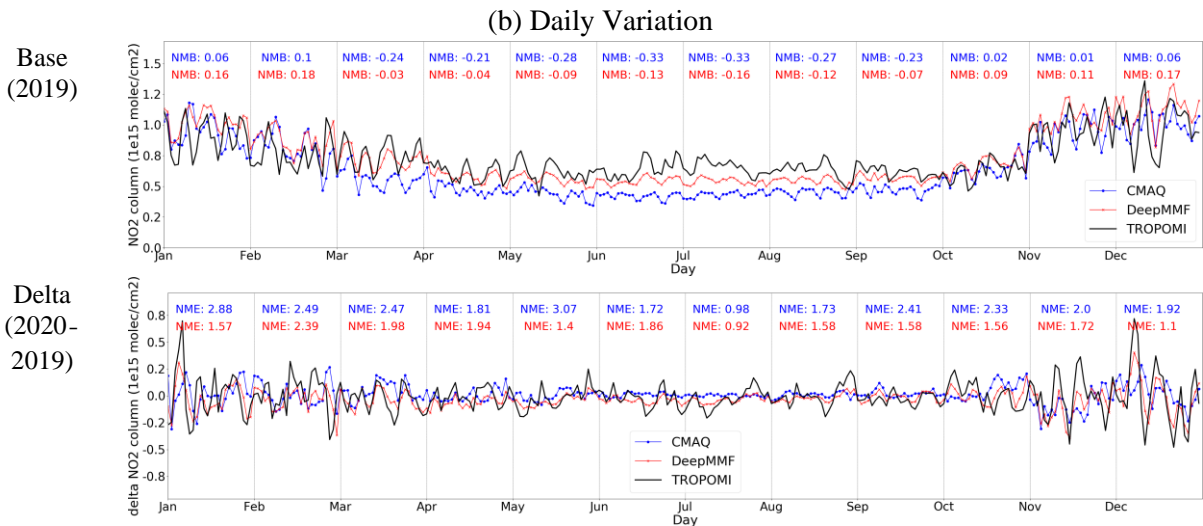

**Figure S9.** Comparison of simulated, observed, and fused NO<sub>2</sub> column density (\*the CMAQ run for 2019 and 2020 are using the same emissions, as “Baseline” and “Hypo-3”)

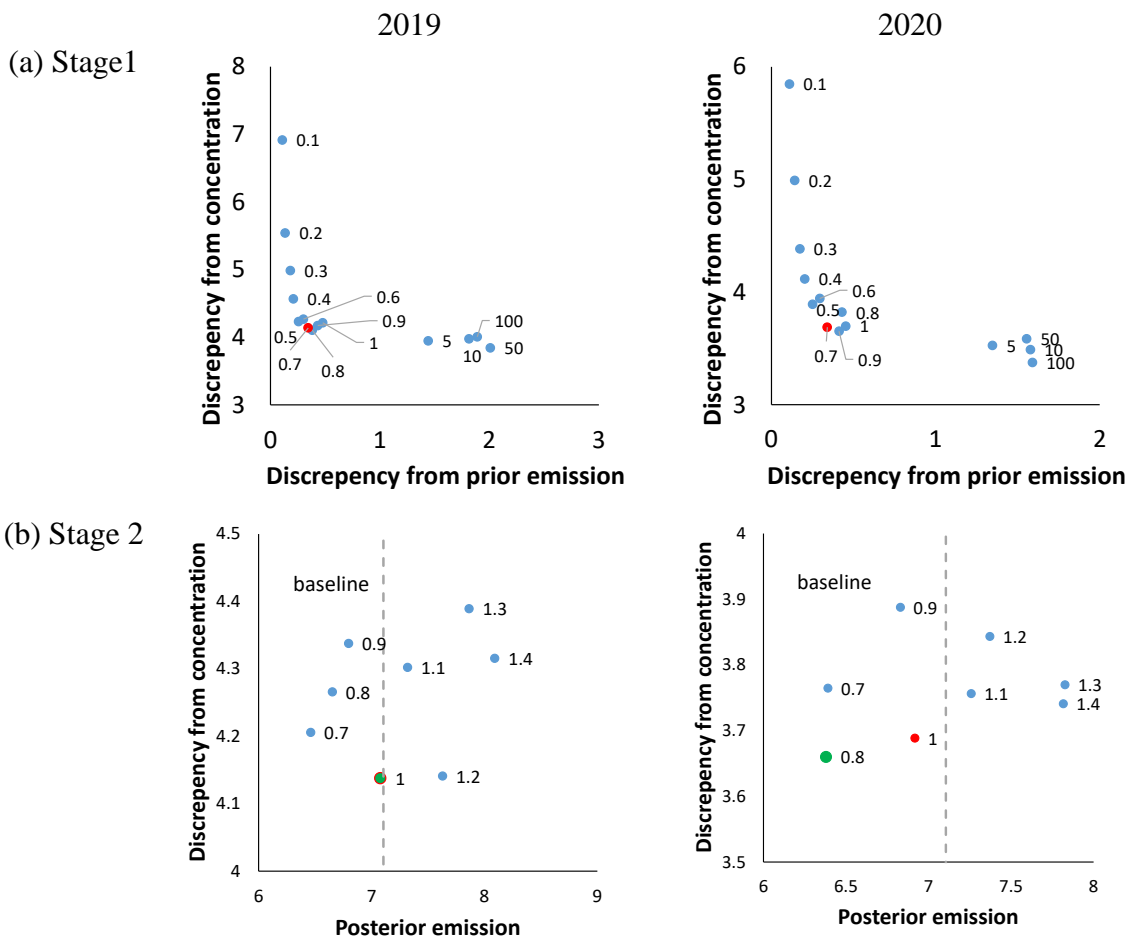

**Figure S10.** Correlation between the discrepancy in posterior and prior emissions and that in predicted concentrations of both surface and column density in 2019 and 2020 retrievals (a: the points was labeled by the weighting value; b: the points was labeled by the prior emission ratio to the baseline emission)

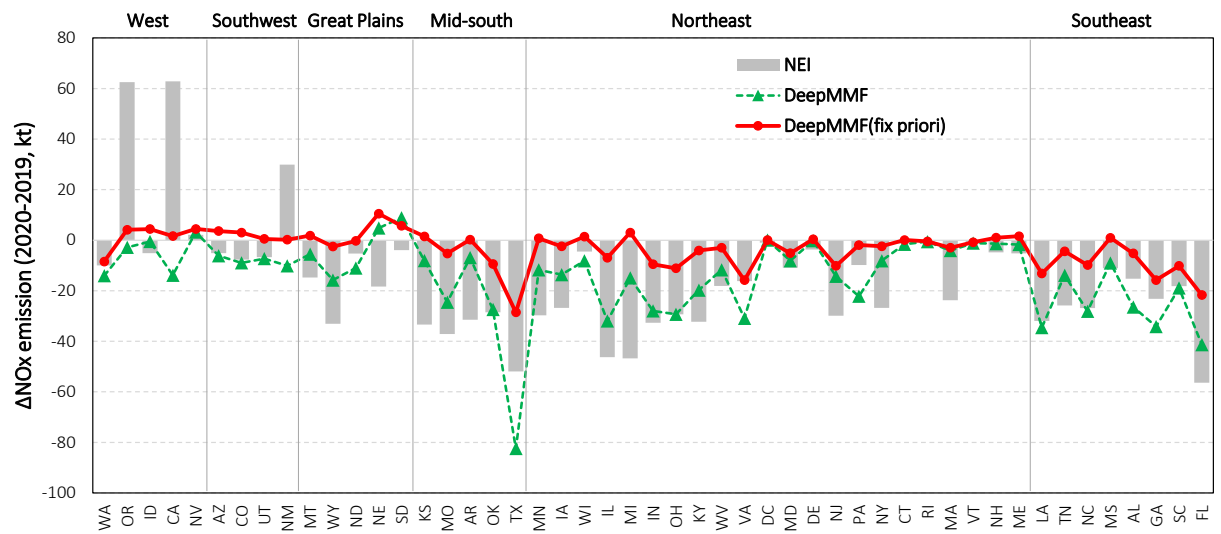

**Figure S11.** Comparison of the change changes in NEI inventory, retrieved by DeepMMF and DeepMMF with fix prior emissions across the states

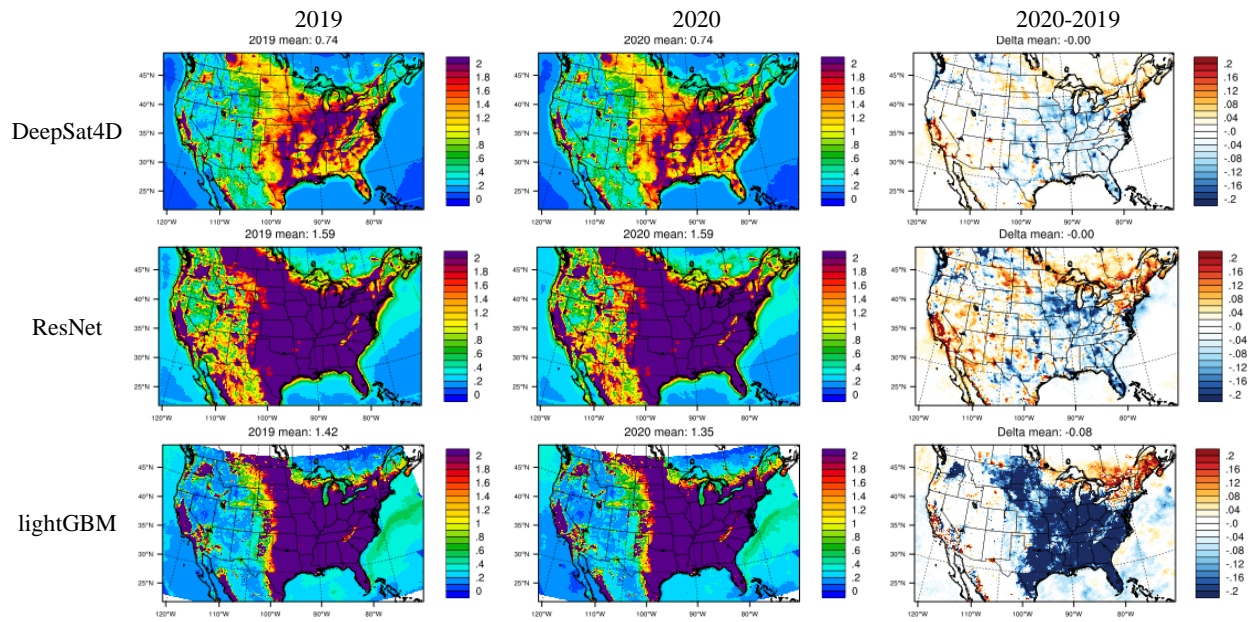

**Figure S12.** Comparison of the fused concentration among different methods



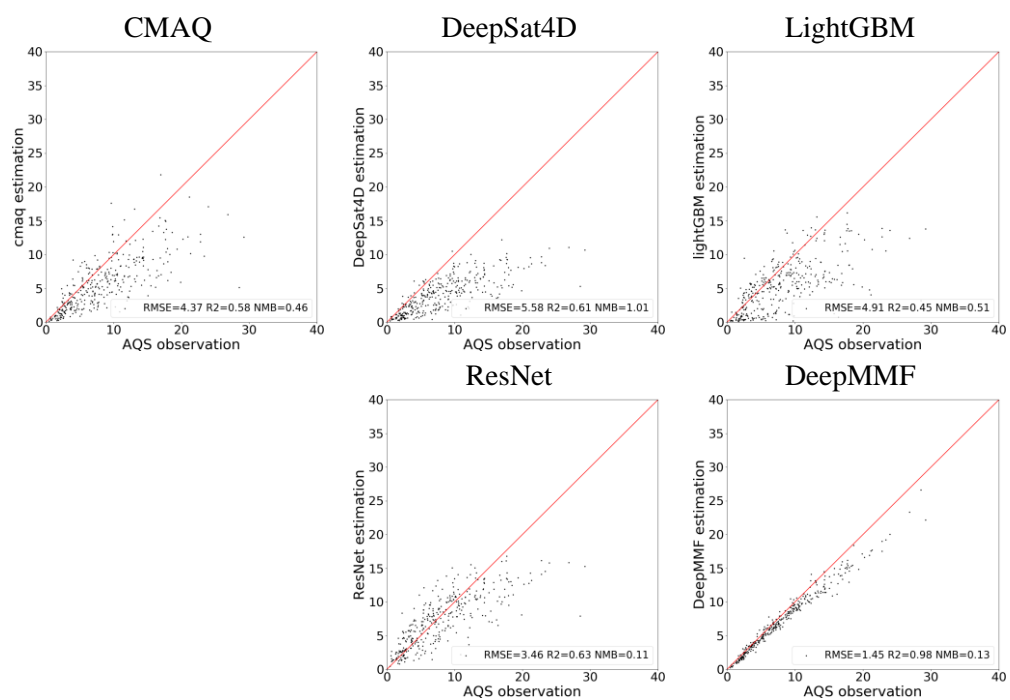

**Figure S13.** Comparison of estimation surface NO<sub>2</sub> concentration with AQS observations (unit: ppb, annual mean in 2019)

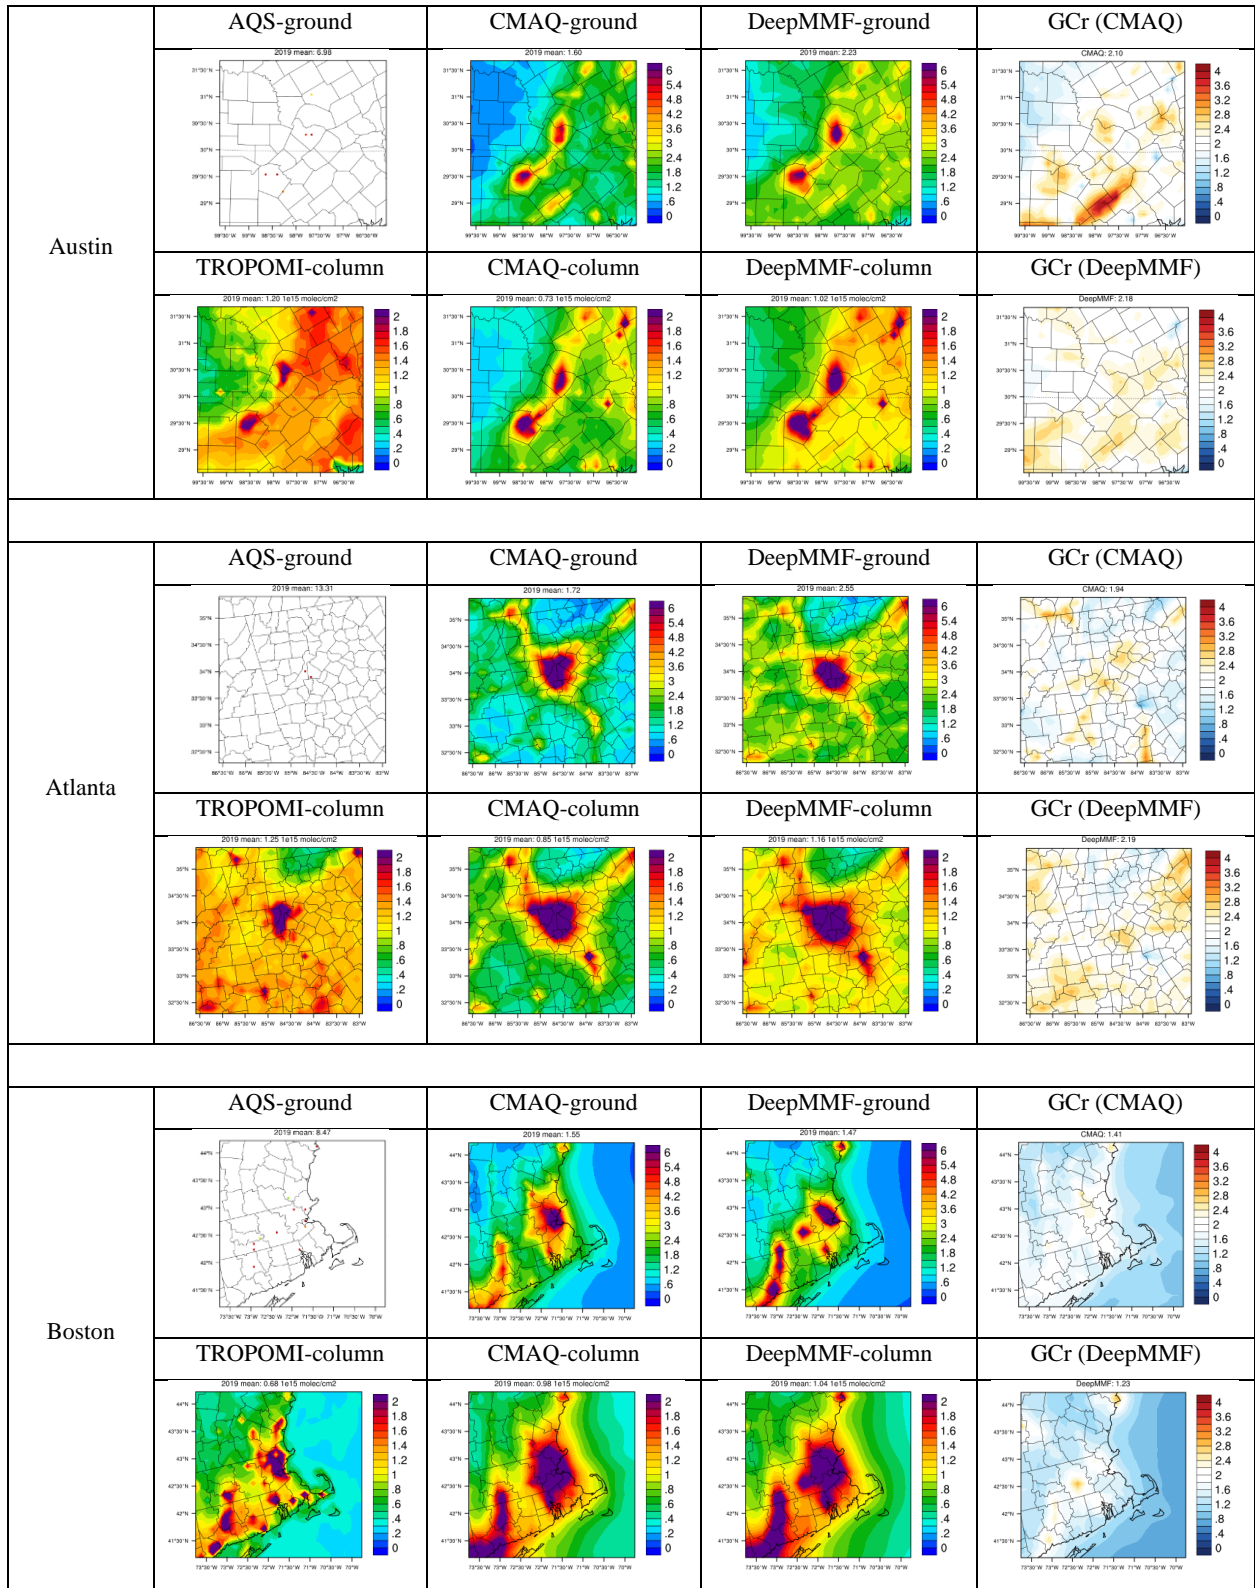

**Figure S14.** Comparison of simulated, observed, and fused ground and column density of NO<sub>2</sub> and its ground-to-column ratio (GCr) across major US Cities (1/6)

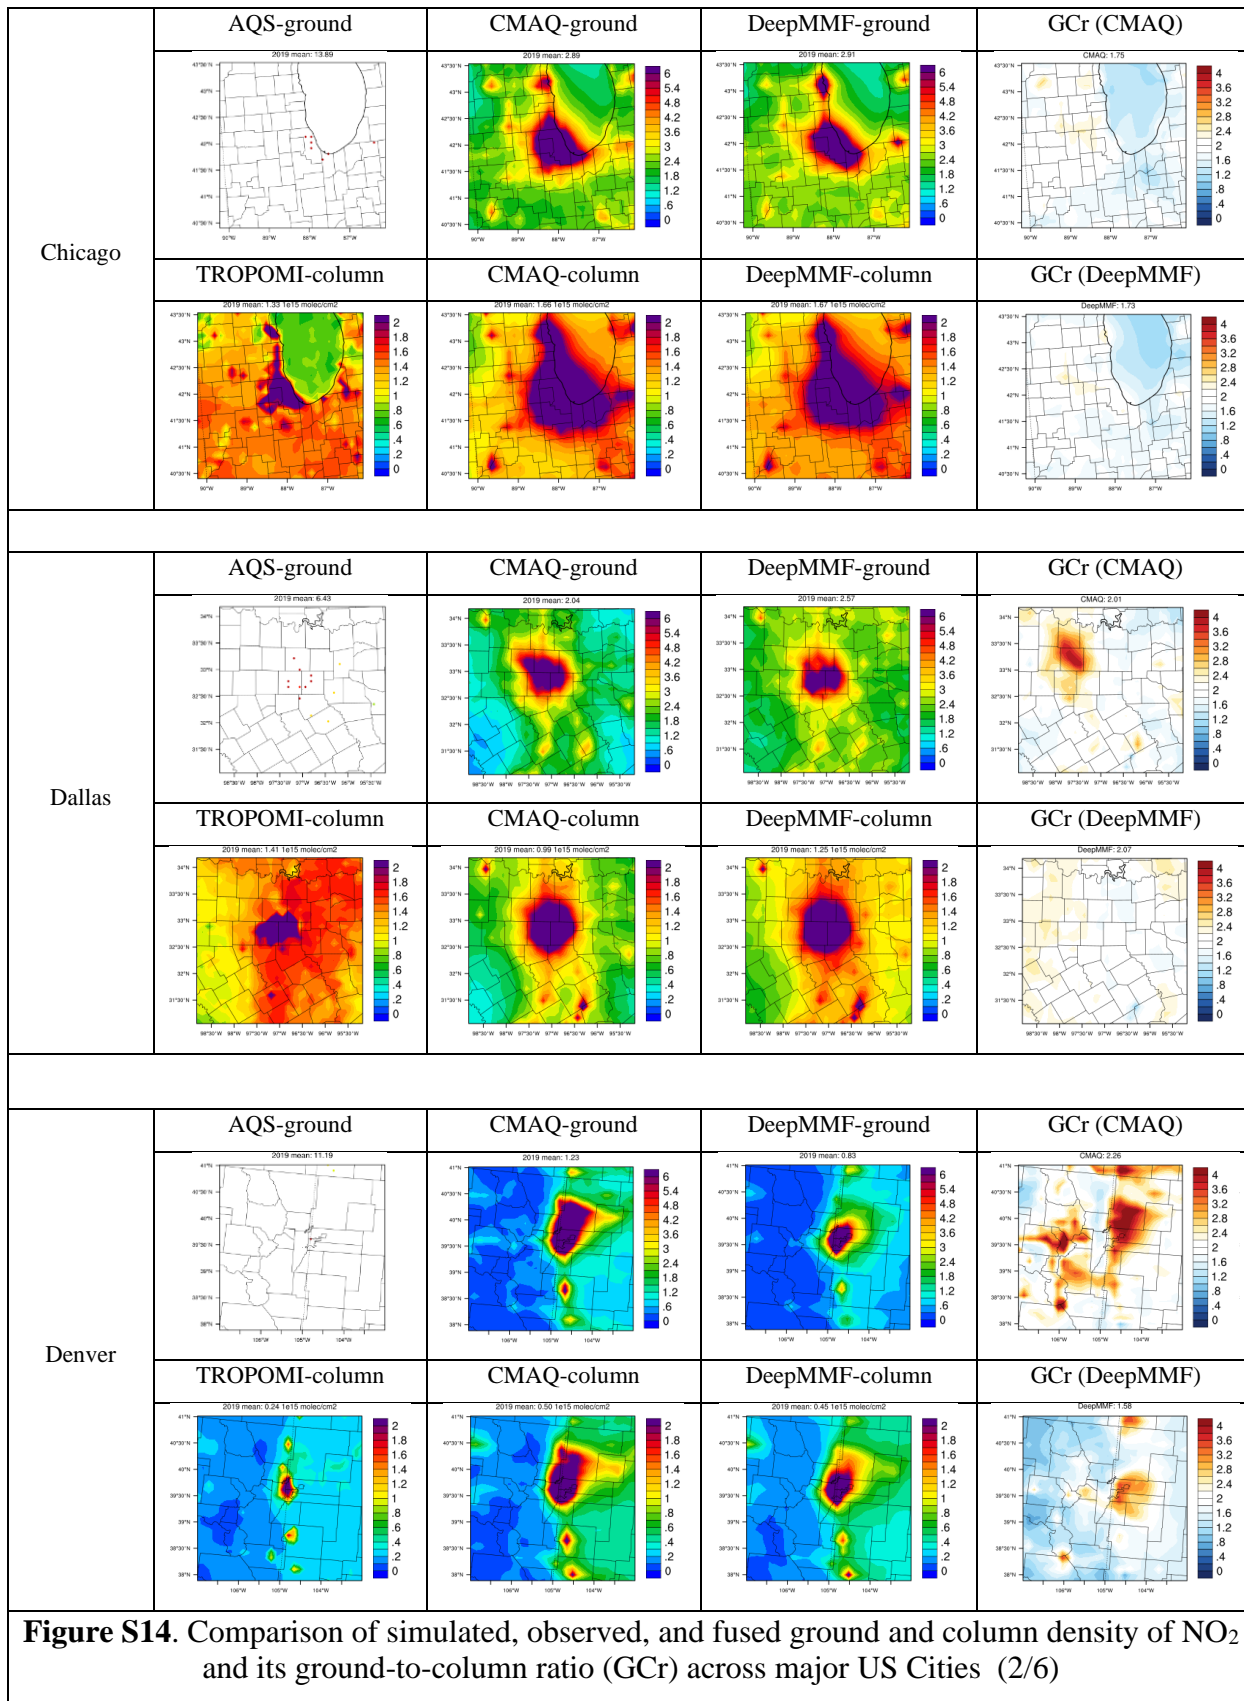

**Figure S14.** Comparison of simulated, observed, and fused ground and column density of NO<sub>2</sub> and its ground-to-column ratio (GCr) across major US Cities (2/6)

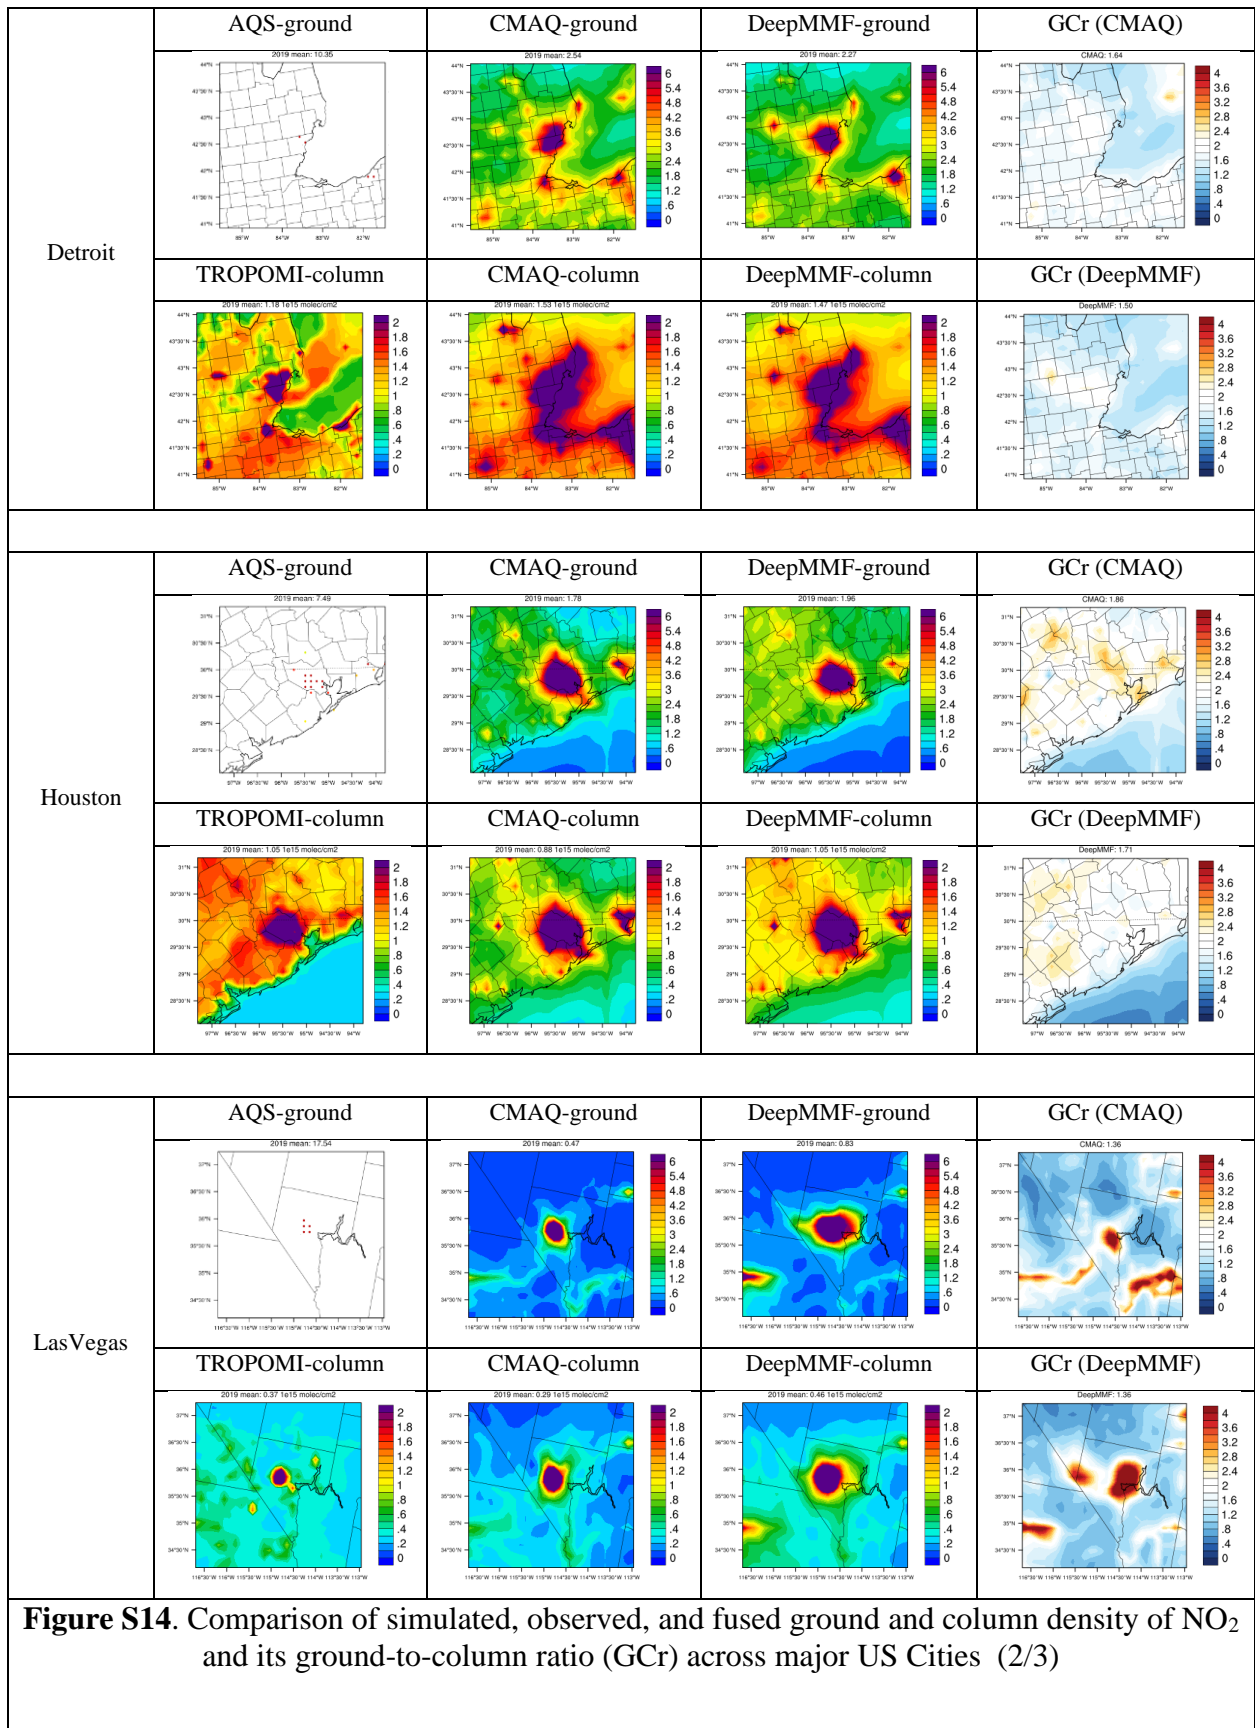

**Figure S14.** Comparison of simulated, observed, and fused ground and column density of NO<sub>2</sub> and its ground-to-column ratio (GCr) across major US Cities (2/3)

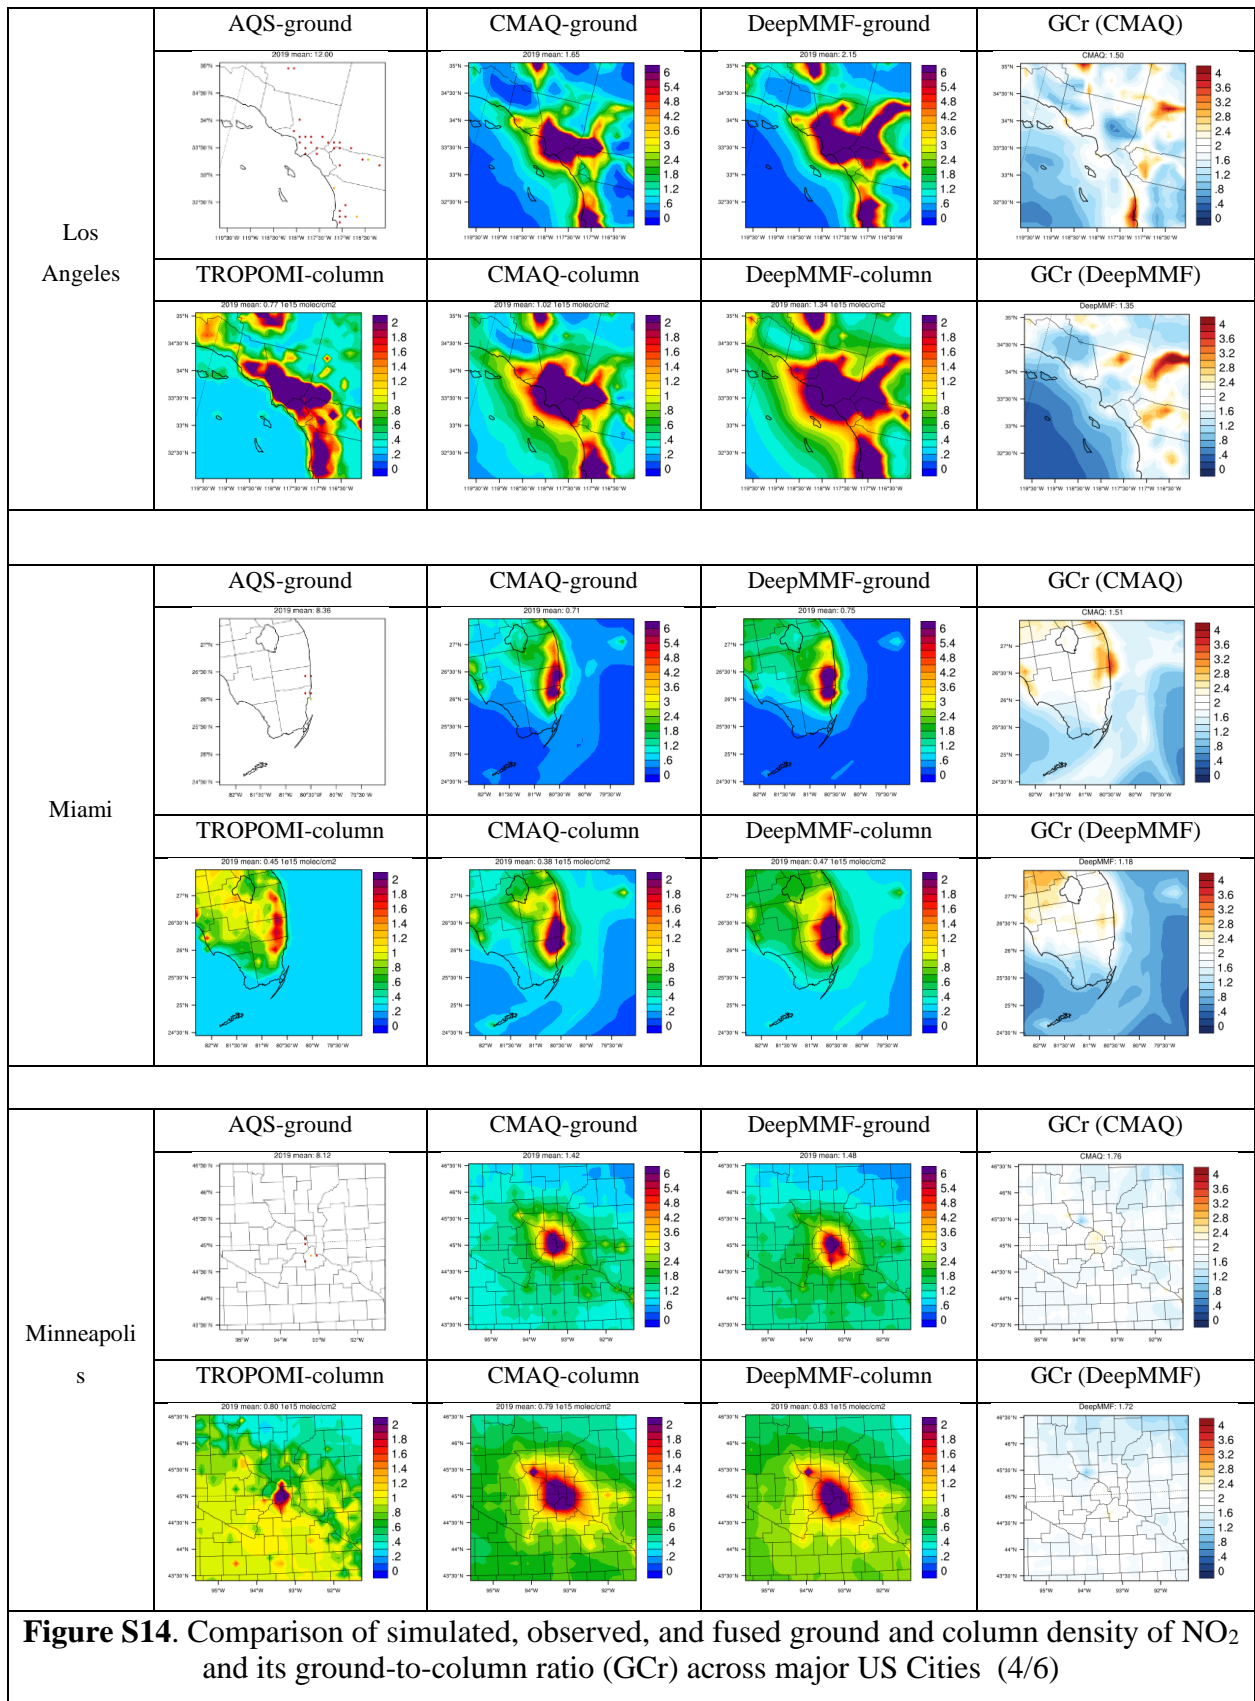

**Figure S14.** Comparison of simulated, observed, and fused ground and column density of NO<sub>2</sub> and its ground-to-column ratio (GCr) across major US Cities (4/6)

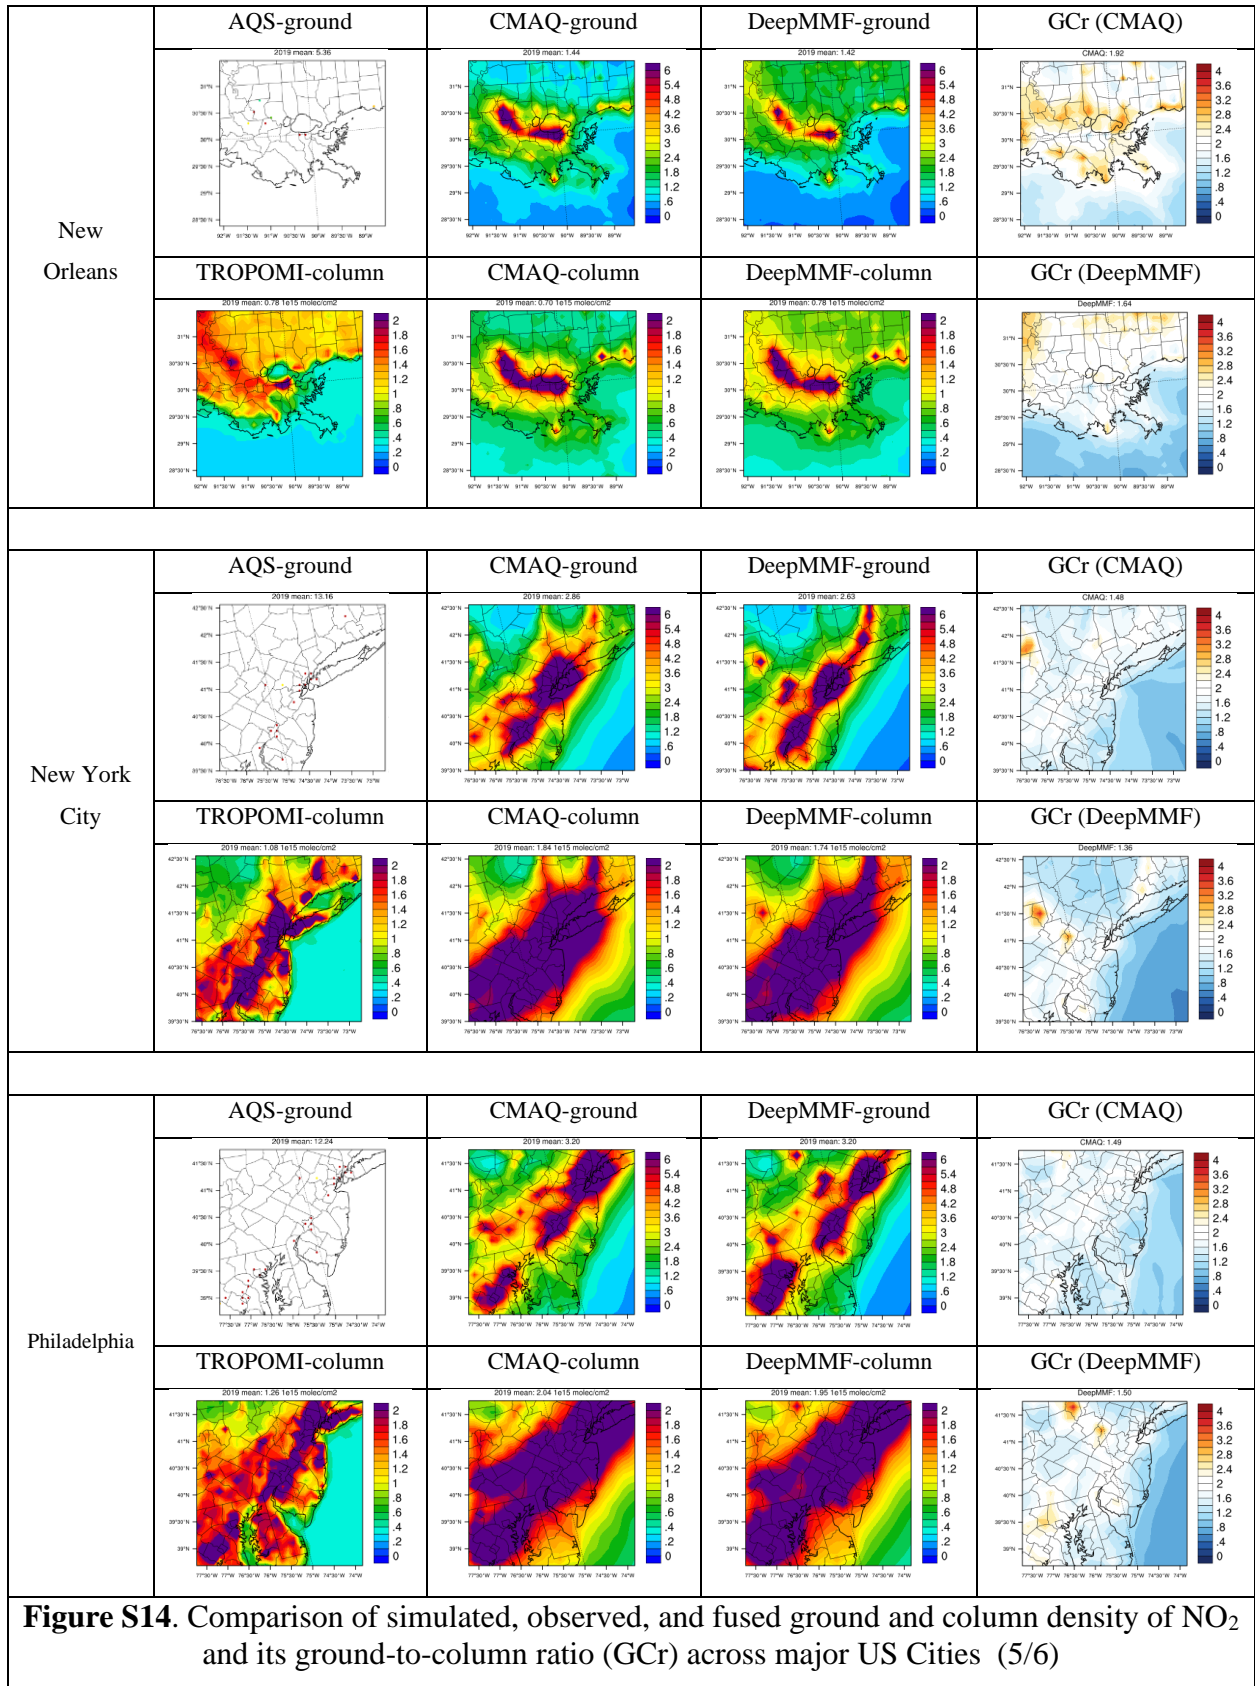

**Figure S14.** Comparison of simulated, observed, and fused ground and column density of NO<sub>2</sub> and its ground-to-column ratio (GCr) across major US Cities (5/6)

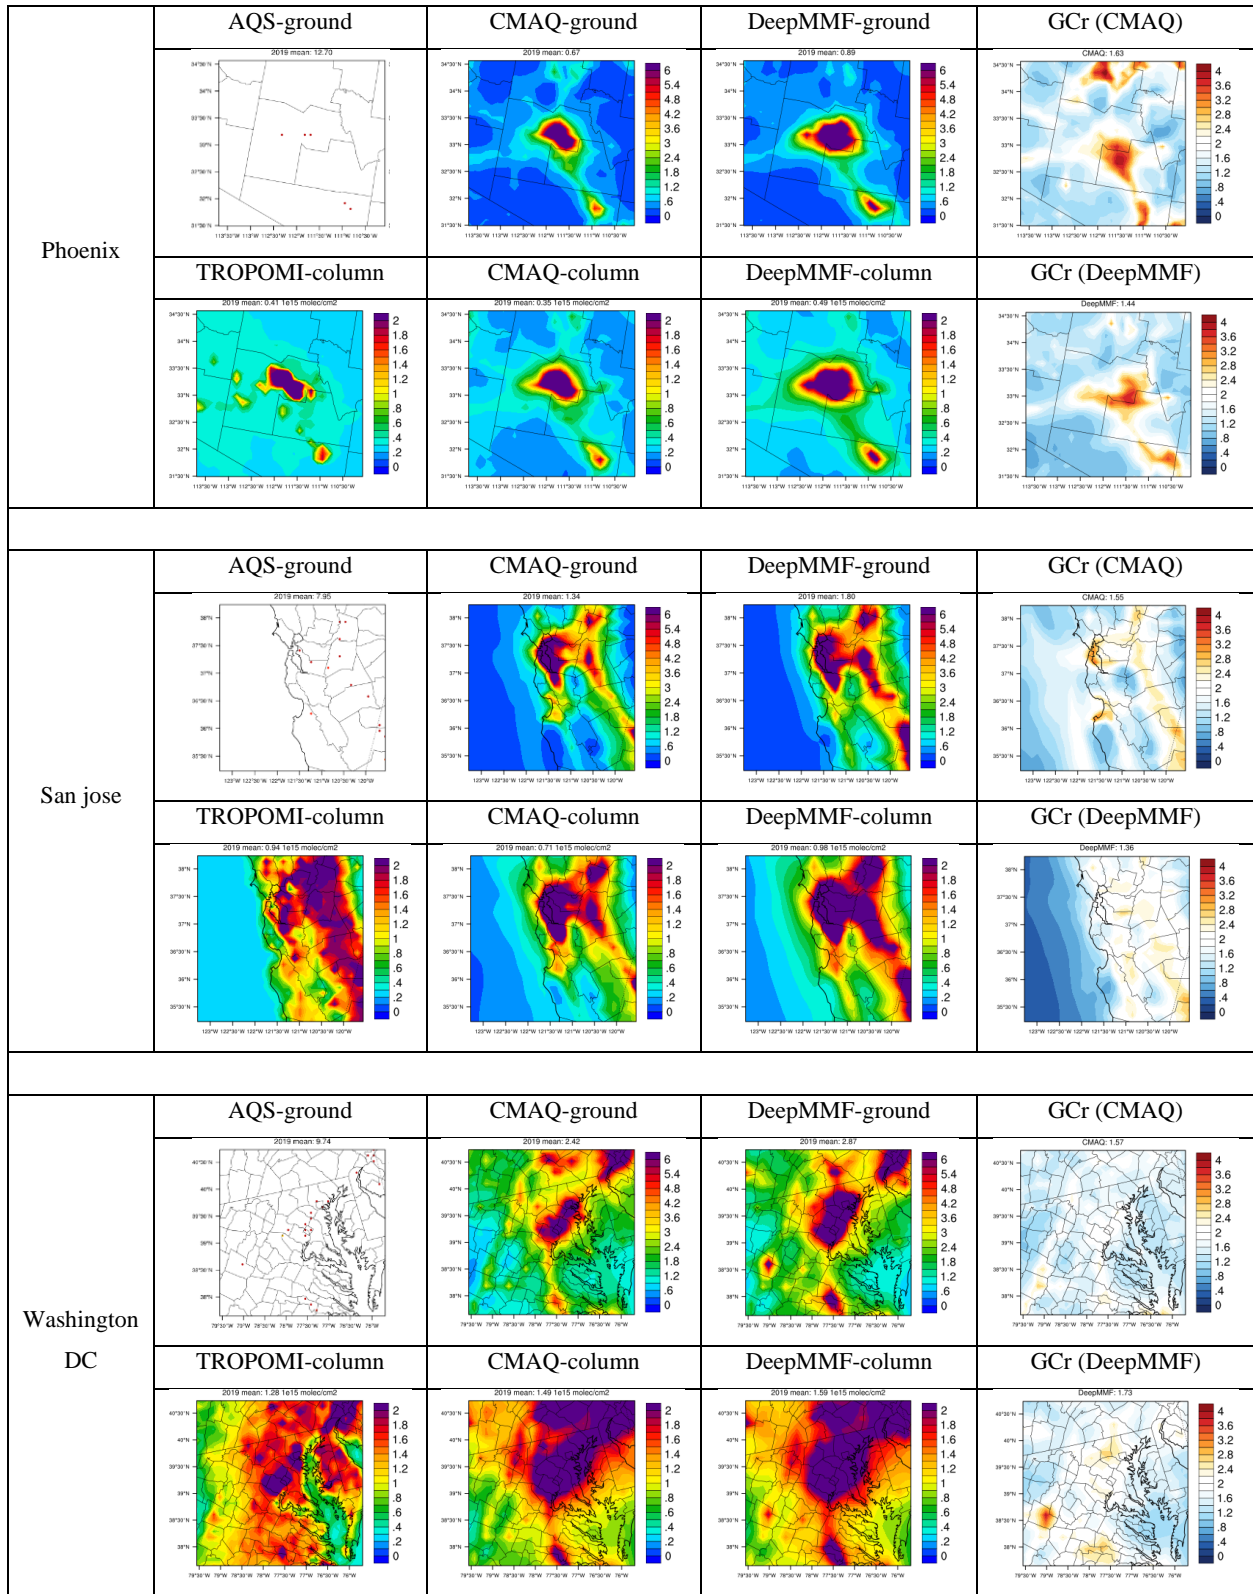

**Figure S14.** Comparison of simulated, observed, and fused ground and column density of NO<sub>2</sub> and its ground-to-column ratio (GCr) across major US Cities
